# Supplementary material for: A new quantitative method for gunshot residue analysis by ion beam analysis
Source: Royal Society of Chemistry journal article supplement (doi:10.1039/c3an00597f), 2013-01-01
Supplement: c3an00597f.pdf [file c3an00597f.pdf]

# A New Quantitative Method for Gunshot Residue Analysis by Ion Beam Analysis: Supporting Information

*Matthew E. Christopher<sup>1</sup>, John-William Warmenhoeven<sup>1,2</sup>, Christopher Jeynes<sup>1</sup>, Neil I. Ward<sup>2</sup>, Roger P. Webb<sup>1</sup>, Karen J. Kirkby<sup>1</sup>, Matteo Donghi<sup>3</sup>, Francesco S. Romolo<sup>4,5</sup> and  
Melanie. J. Bailey<sup>2</sup>*

<sup>1</sup> Surrey Ion Beam Centre, University of Surrey, GU2 7XH, UK

<sup>2</sup> Department of Chemical Sciences, University of Surrey, GU2 7XH, UK

<sup>3</sup> Reparto Investigazioni Scientifiche Carabinieri, Parma, Italy

<sup>4</sup> Dipartimento di Scienze Anatomiche, Istologiche, Medico-Legali e dell'Apparato  
Locomotore, SAPIENZA Università di Roma, Italy

<sup>5</sup> Institut de Police Scientifique, Université de Lausanne, Switzerland

Background Subtraction Protocol

|         | Sample stub |      |      |      |      |      |      |      |      |      |      |      |      |      |      |      |       |
|---------|-------------|------|------|------|------|------|------|------|------|------|------|------|------|------|------|------|-------|
| Element | OG3         | OG4  | OG6  | OG8  | OG16 | OG18 | OG19 | OG21 | OG28 | OG40 | OG45 | SP1  | SP2  | SP3  | SP4  | SP5  | Worst |
| P       | 873         | 1211 | 1652 | 813  | 689  | 1578 | 1224 | 972  | 906  | 519  | 592  | 3938 | 4195 | -    | -    | -    | 4195  |
| S       | 3515        | 5120 | 7109 | 3760 | 2868 | 7145 | 5258 | 4069 | 4025 | 2938 | 2423 | 1891 | 364  | 3274 | 3627 | 4543 | 7145  |
| Cl      | 73          | 163  | 129  | 65   | -    | 162  | 149  | 83   | -    | 392  | -    | 502  | 198  | -    | -    | 651  | 651   |
| K       | 42          | 85   | 442  | 119  | 42   | 103  | 70   | 42   | 52   | 113  | 105  | 237  | 142  | -    | 158  | -    | 442   |
| Ca      | -           | -    | -    | -    | -    | -    | -    | -    | -    | -    | -    | -    | -    | 113  | -    | -    | 113   |
| Cu      | 105         | 183  | 1064 | 322  | 77   | 178  | 27   | 65   | 78   | 568  | 210  | 262  | -    | -    | 130  | -    | 1064  |
| Zn      | -           | -    | 47   | 76   | -    | -    | -    | -    | -    | -    | -    | -    | -    | -    | -    | -    | 76    |
| Ba      | 81          | -    | 580  | 116  | -    | -    | -    | -    | -    | -    | -    | -    | -    | -    | -    | -    | 580   |
| Pb      | -           | -    | 1523 | 214  | -    | -    | -    | -    | -    | -    | -    | -    | -    | -    | -    | -    | 1523  |

Figure S1: Extracted concentration results from blank spots on the carbon tabs. Red highlights indicate the highest concentration found which are compiled into a ‘Worst case scenario’ stub detailed on the far right. Units are mg/kg.

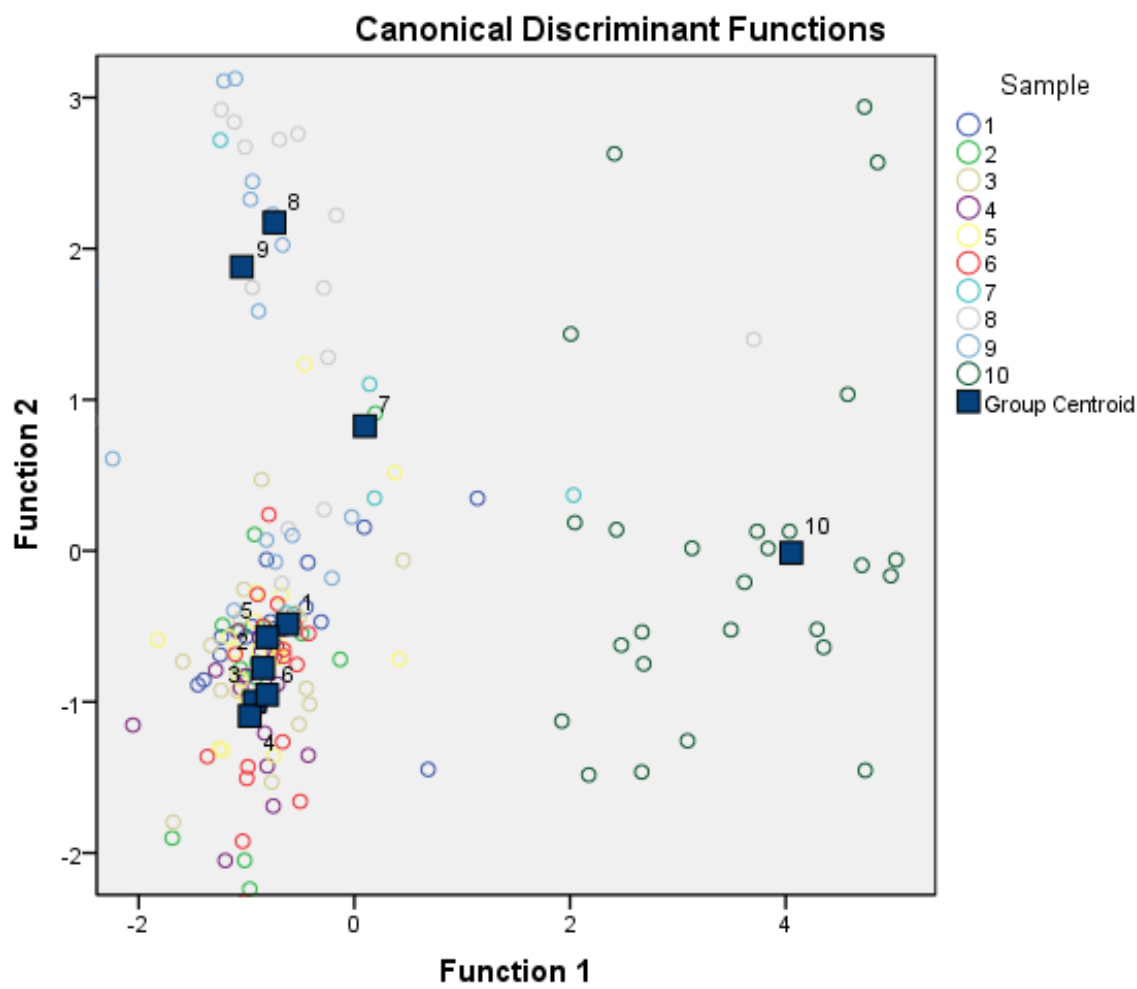

Figure S2: Non-background subtracted CDFA plot

## Box Plots Illustrating Elemental Concentrations of Samples Collected From Hands

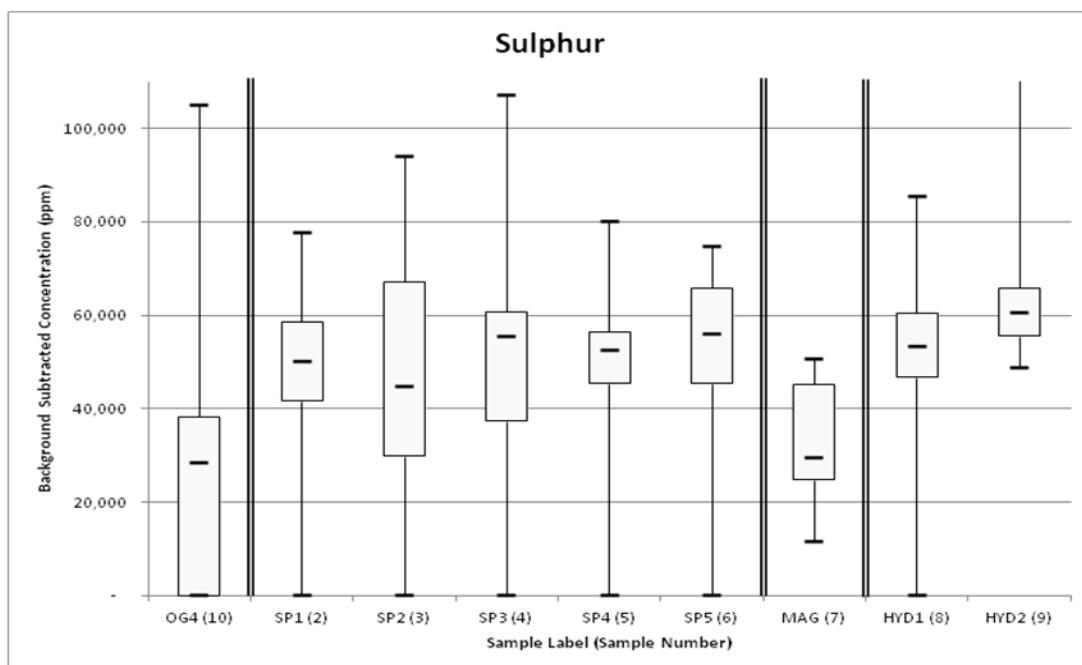

Figure S3: Box plots representing the background subtracted concentrations of Sulphur in the samples studied. The HYD2 (9) sample has an outlier at 433,503.7 ppm.

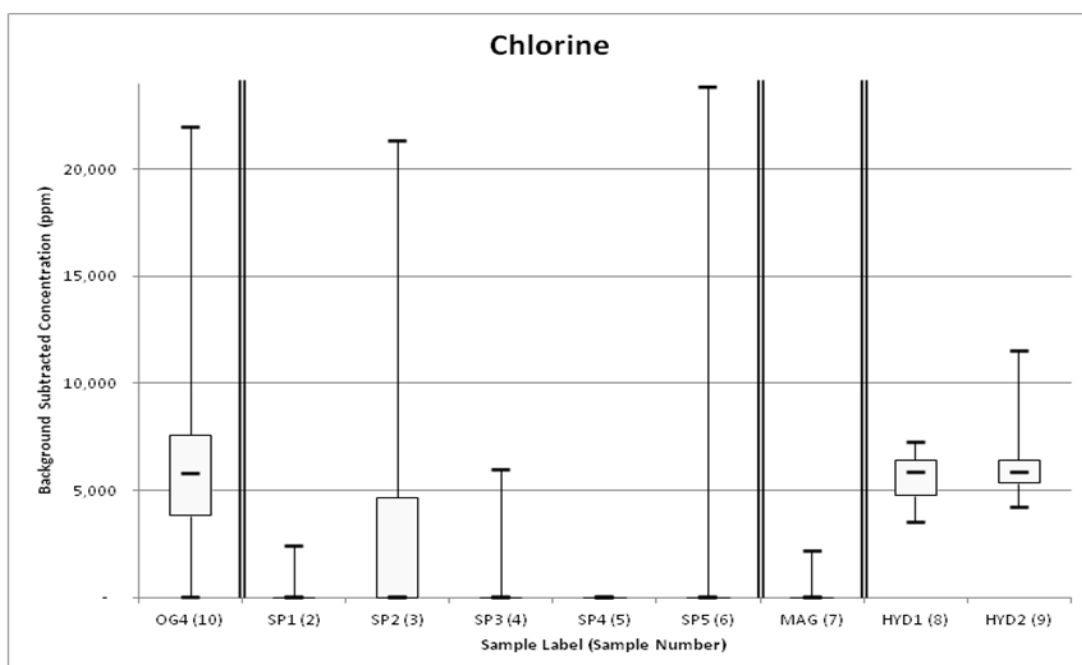

Figure S4: Box plots representing the background subtracted concentrations of Chlorine in the samples studied. Cl was only intermittently detected in the SP samples but consistently in OG4 (10) and the HYD samples (8 & 9).

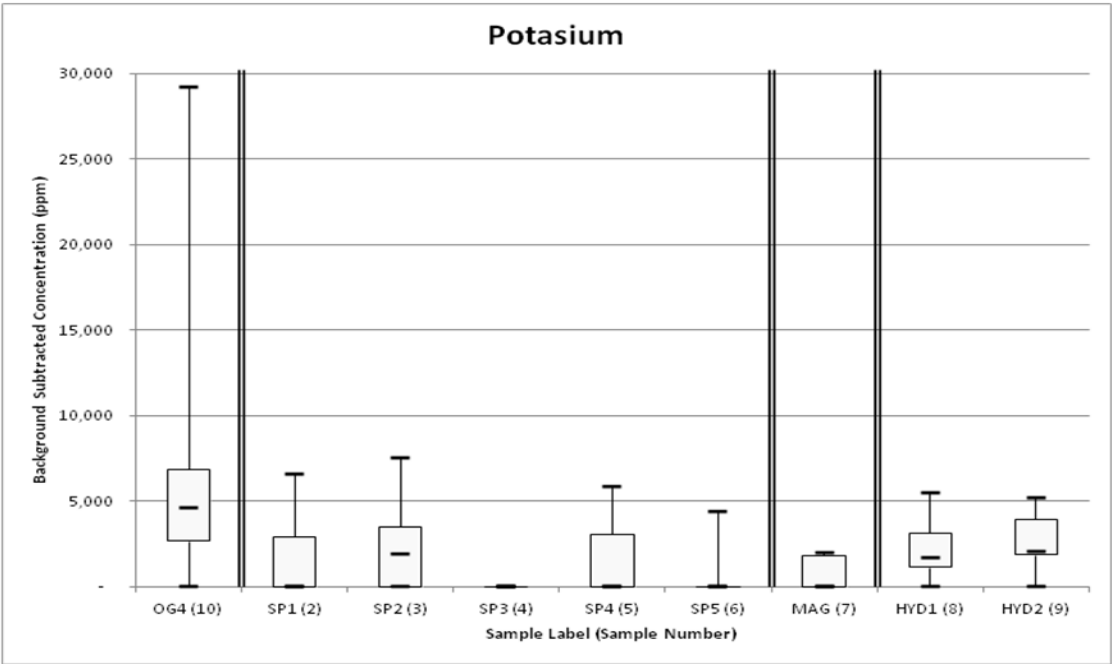

Figure S5: Box plots representing the background subtracted concentrations of Potassium in the samples studied.

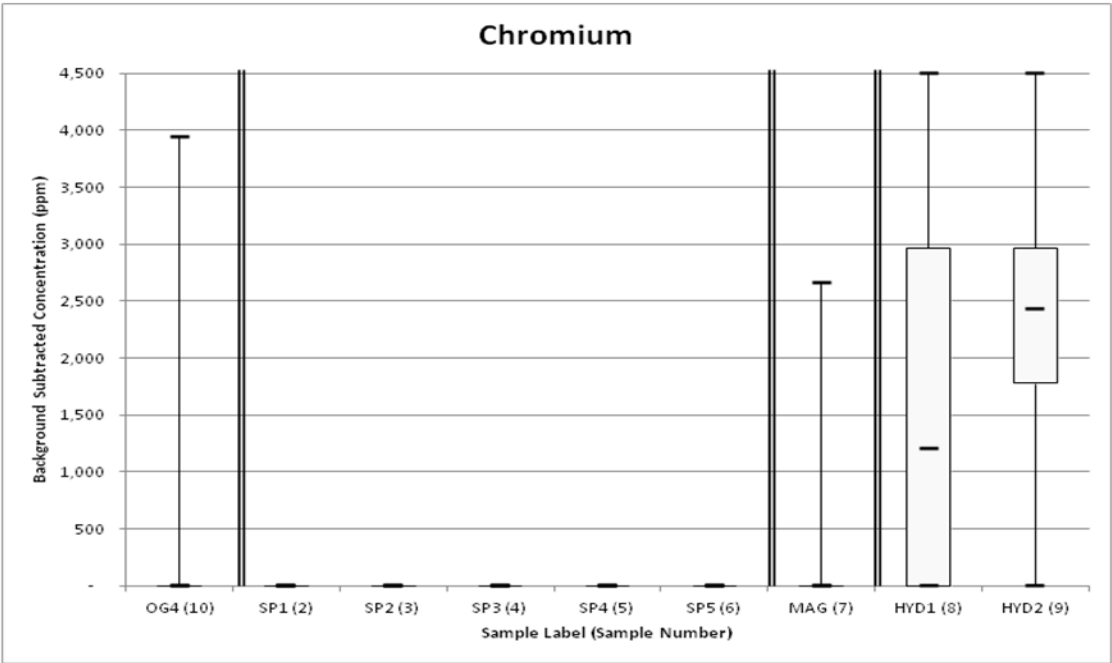

Figure S6: Box plots representing the background subtracted concentrations of Chromium in the samples studied.

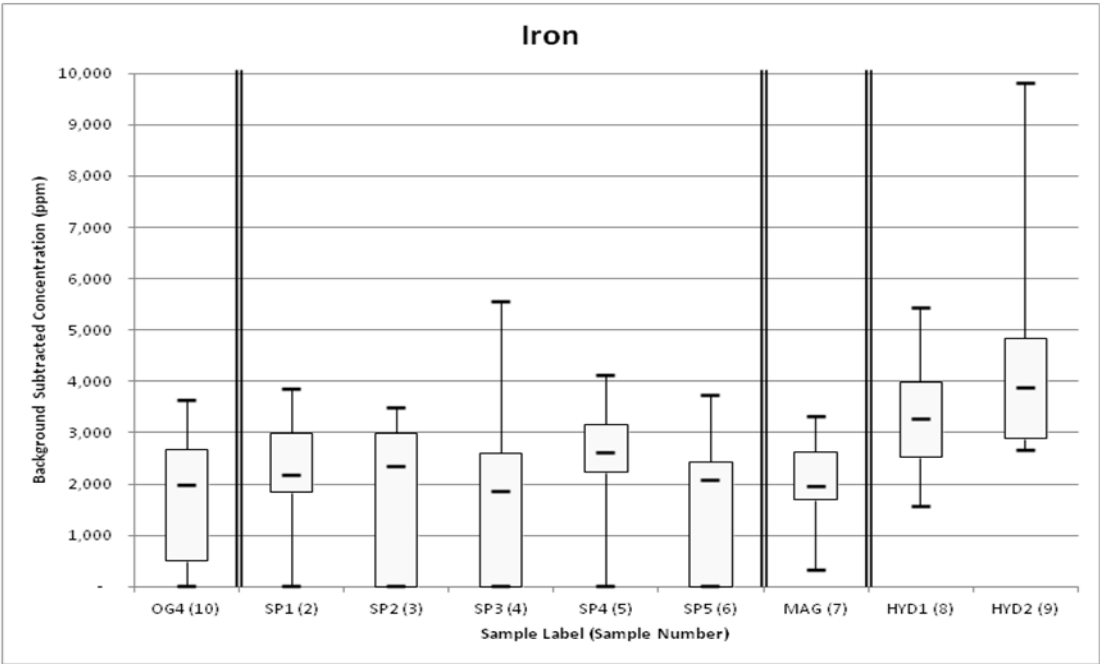

Figure S7: Box plots representing the background subtracted concentrations of Iron in the samples studied.

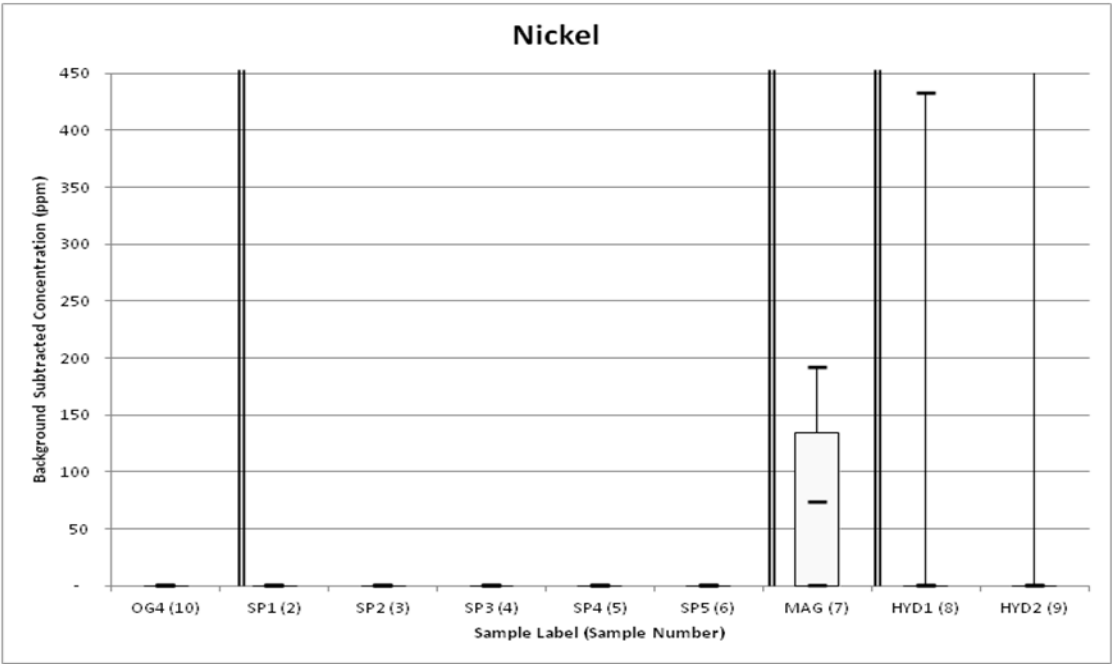

Figure S8: Box plots representing the background subtracted concentrations of Nickel in the samples studied. The HYD2 (9) sample has an outlier at 7,940.3 ppm.

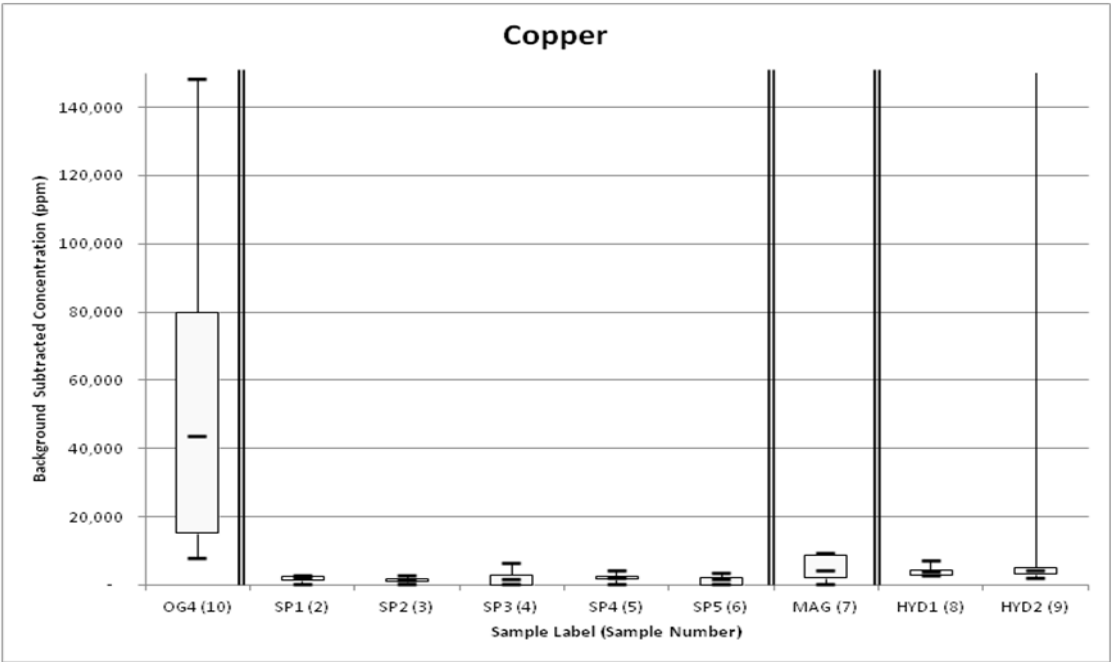

Figure S9: Box plots representing the background subtracted concentrations of Copper in the samples studied. The HYD2 (9) sample has an outlier at 250,278.9 ppm. This figure showcases the large difference in copper concentration between cartridge case samples and hand samples.

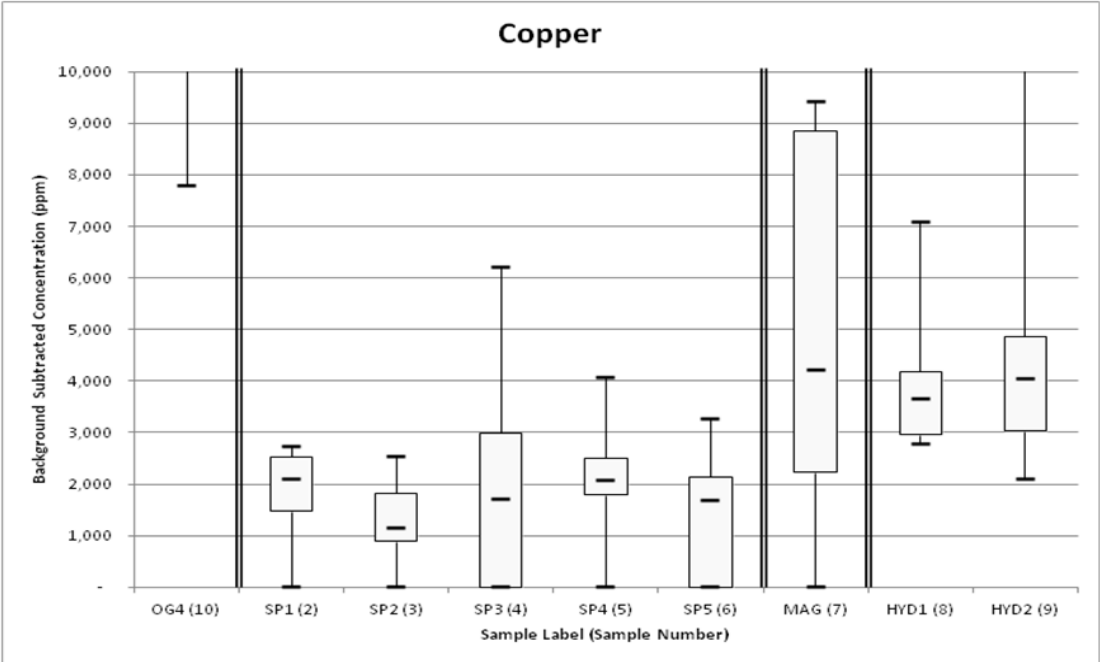

Figure S10: Box plots representing the background subtracted concentrations of Copper in the samples studied. This figure showcases the differences in copper concentration between the hand samples.

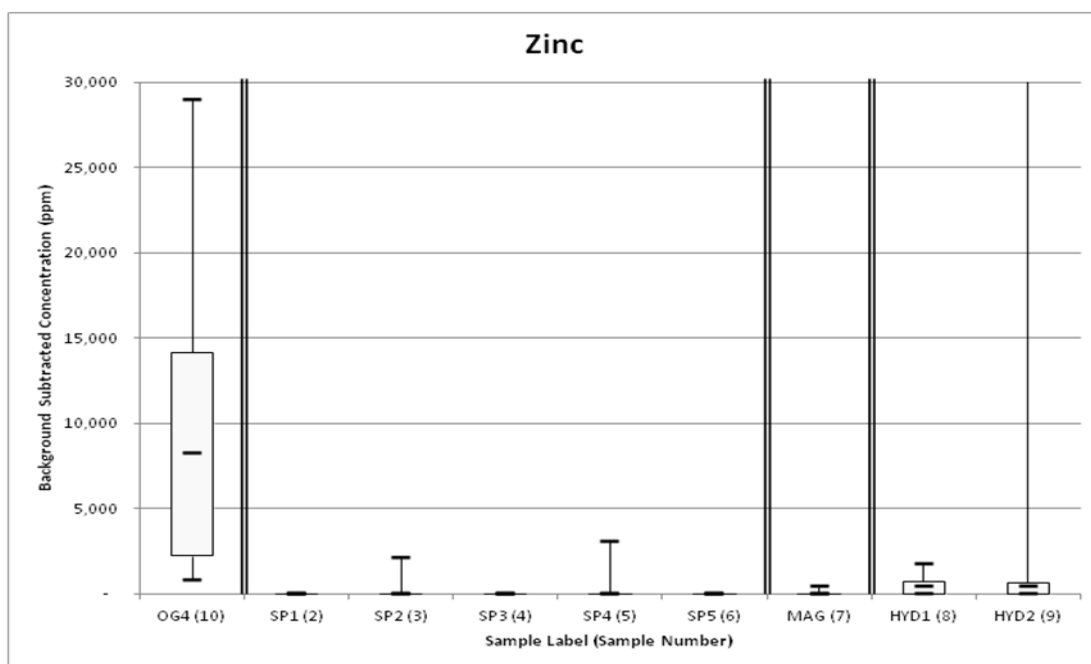

Figure S11: Box plots representing the background subtracted concentrations of Zinc in the samples studied. The HYD2 (9) sample has an outlier at 227,764.1 ppm.

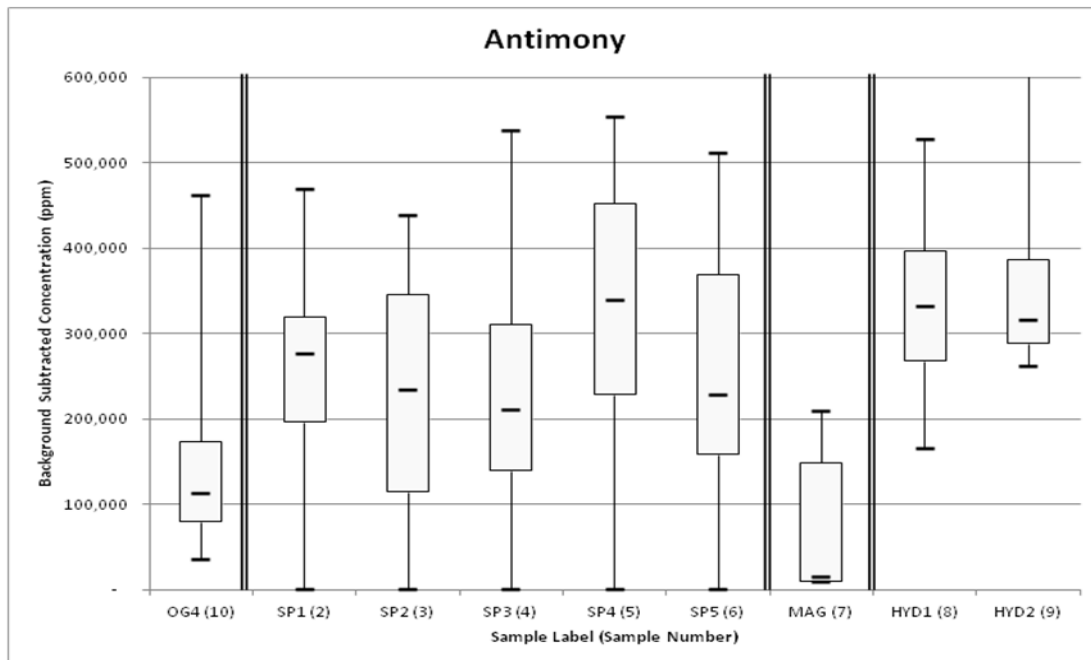

Figure S12: Box plots representing the background subtracted concentrations of Antimony in the samples studied. The HYD2 (9) sample has an outlier at 1,330,323.6 ppm.



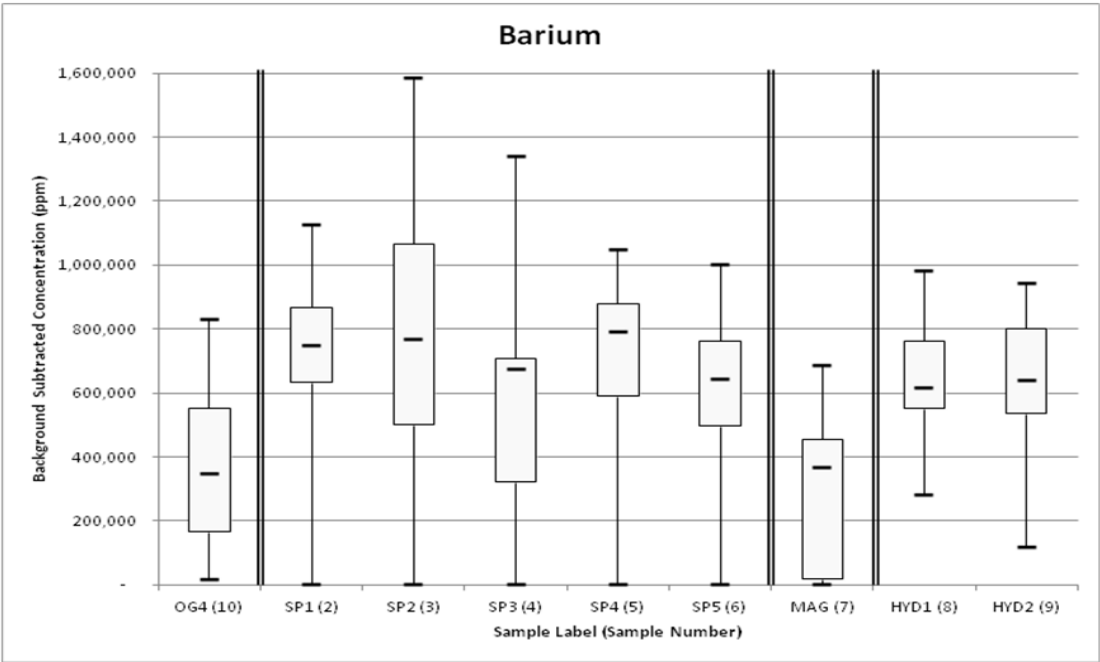

Figure S13: Box plots representing the background subtracted concentrations of Barium in the samples studied.

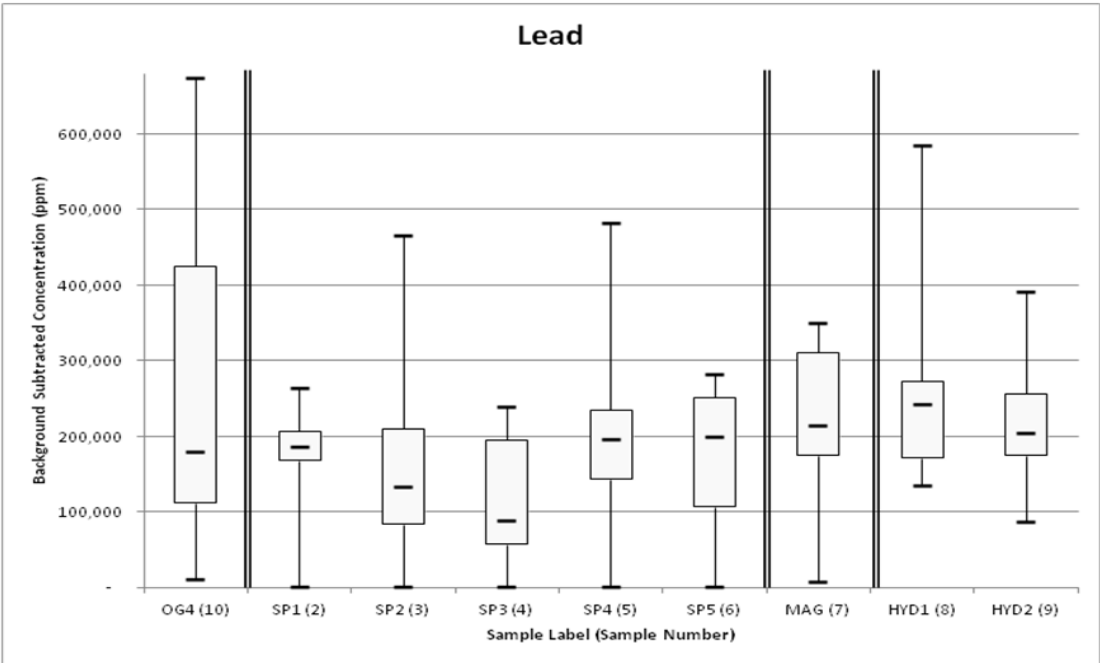

Figure S14: Box plots representing the background subtracted concentrations of Lead in the samples studied.

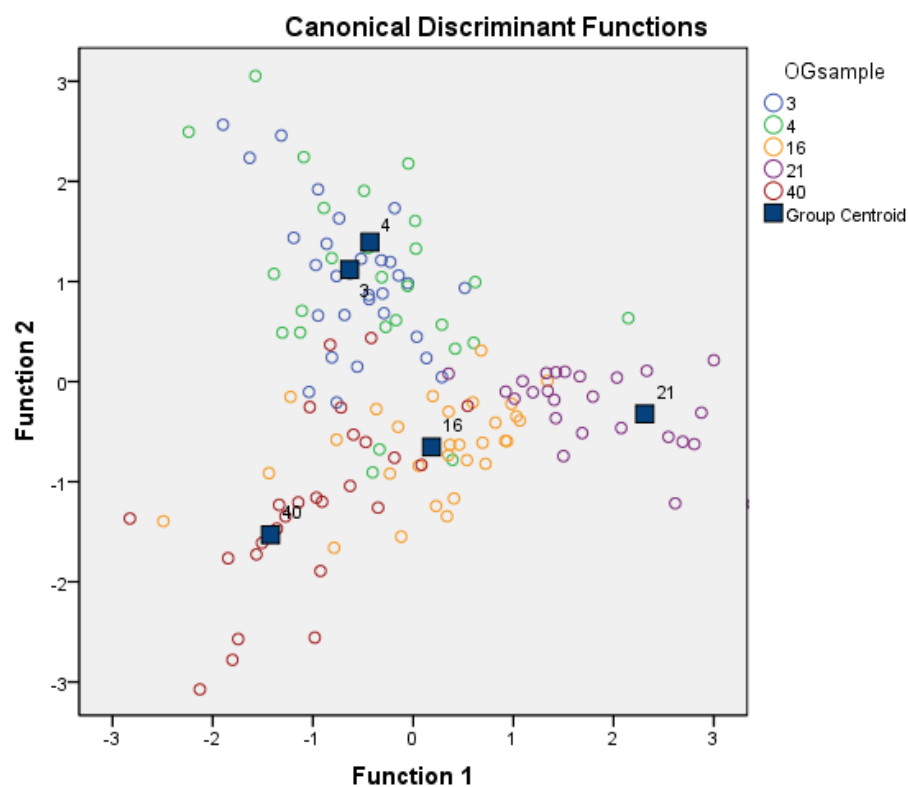

Figure S15: Figure 15: Multivariate CDFA plot of characteristic GSR particles collected from cartridge cases

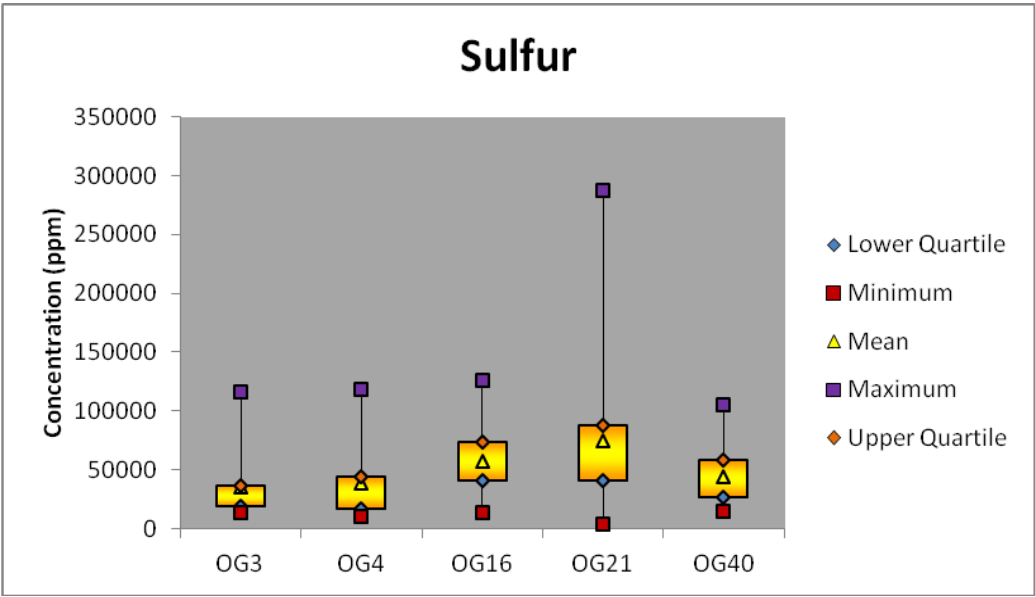

Figure S16: Box plots representing the background subtracted concentrations of S in the cartridge case samples.

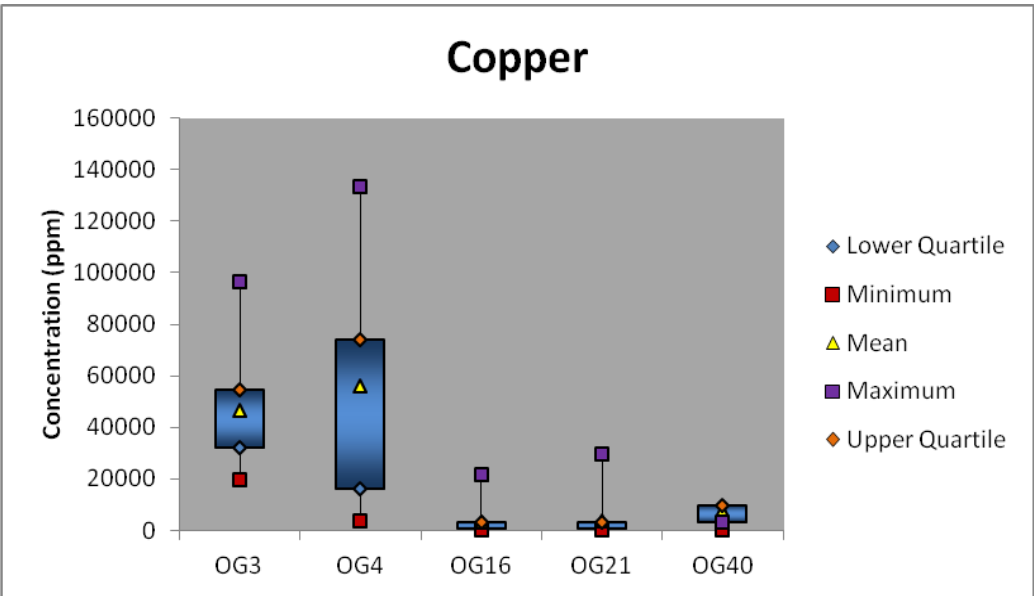

Figure S17: Box plots representing the background subtracted concentrations of Cu in the cartridge case samples.

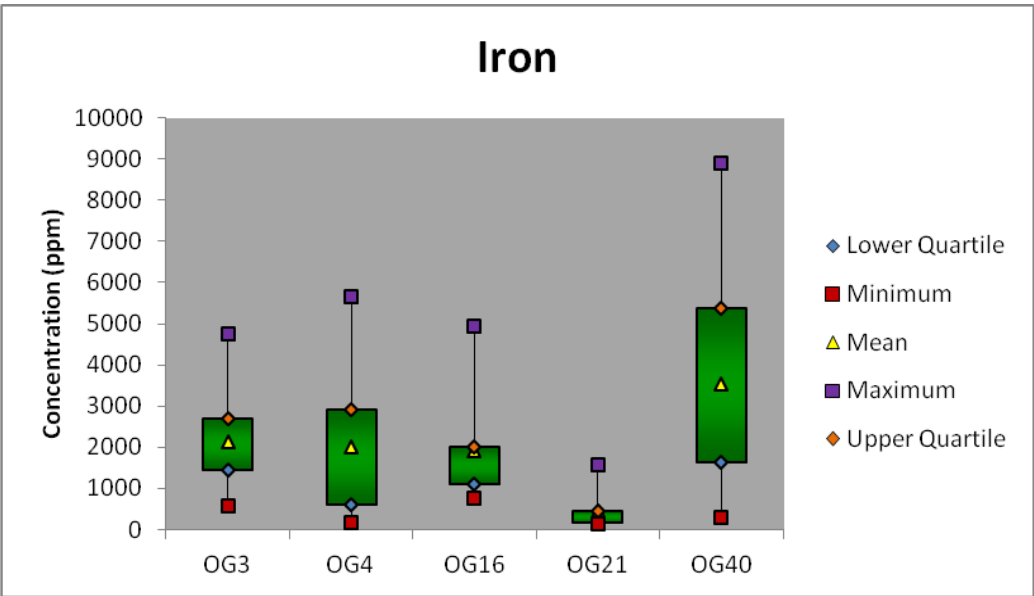

Figure S18: Box plots representing the background subtracted concentrations of Fe in the cartridge case samples.
